# Supplementary material for: Outcomes in patients with BRAFV600–mutated melanoma and brain metastases at baseline treated with dabrafenib plus trametinib
Source: PubMed Central journal article supplement — Tumori. 2023 Jul 7;109(6):537–45. doi: 10.1177/03008916231179251 (PMC10702308; doi:10.1177/03008916231179251), 2023-07-07
Supplement: sj-pdf-1-tmj-10.1177_03008916231179251.pdf [file sj-pdf-1-tmj-10.1177_03008916231179251.pdf]

# Supplementary Figure 1. Patient attrition chart.

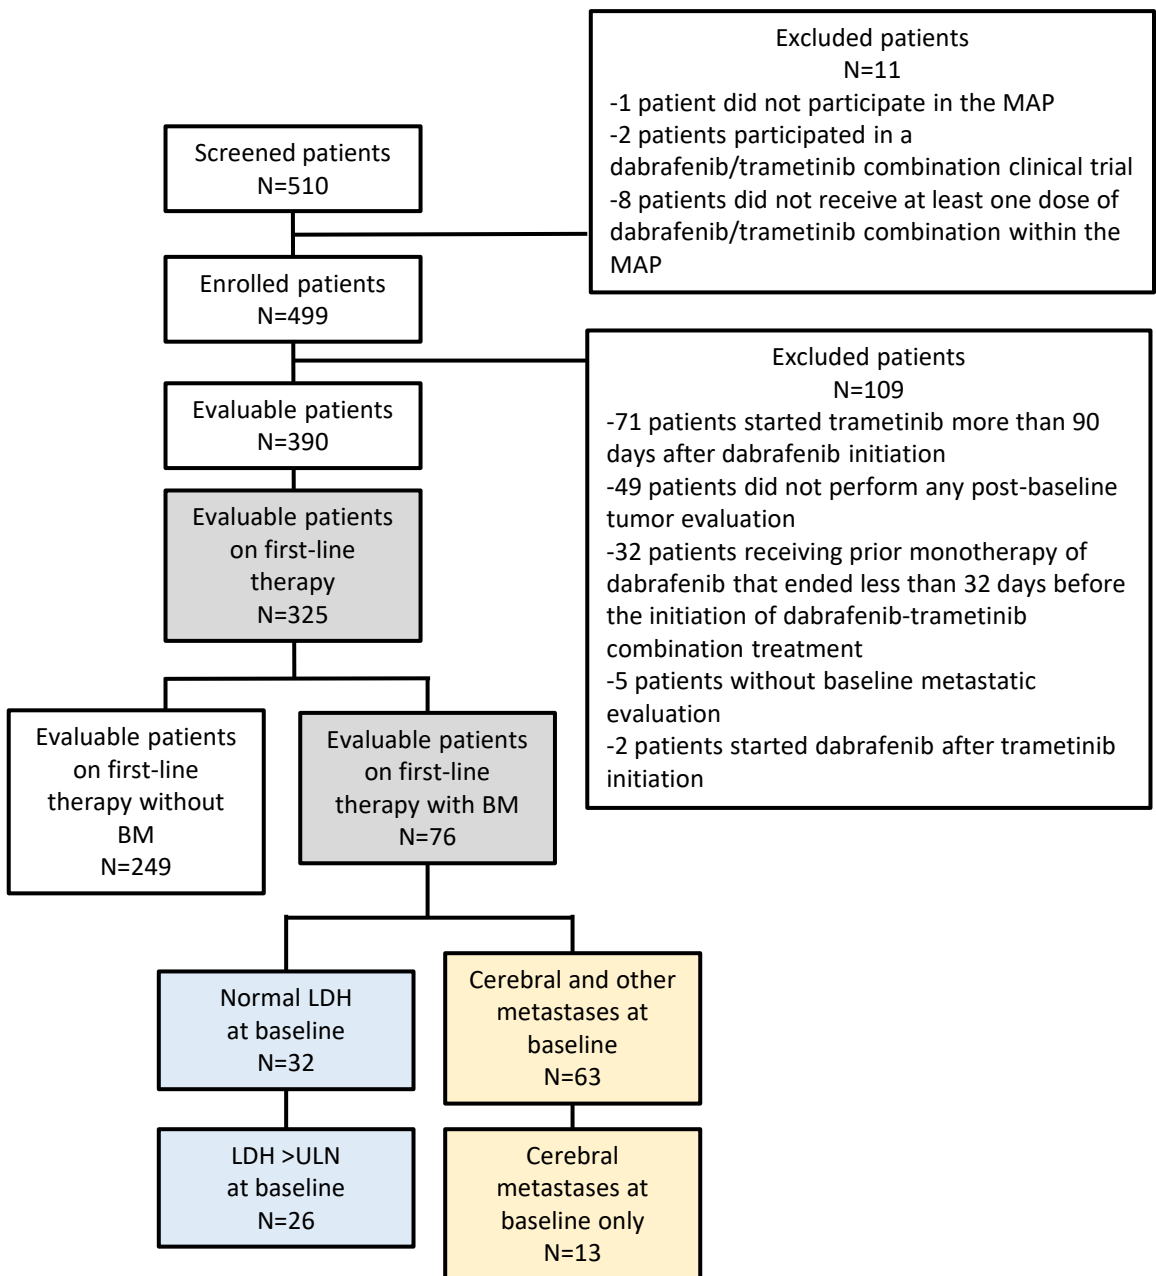

BM, brain metastases; LDH, lactate dehydrogenase; MAP, managed access program; ULN, upper limit of normal.

**Supplementary Figure 2.** Baseline patient demographics and disease characteristics.

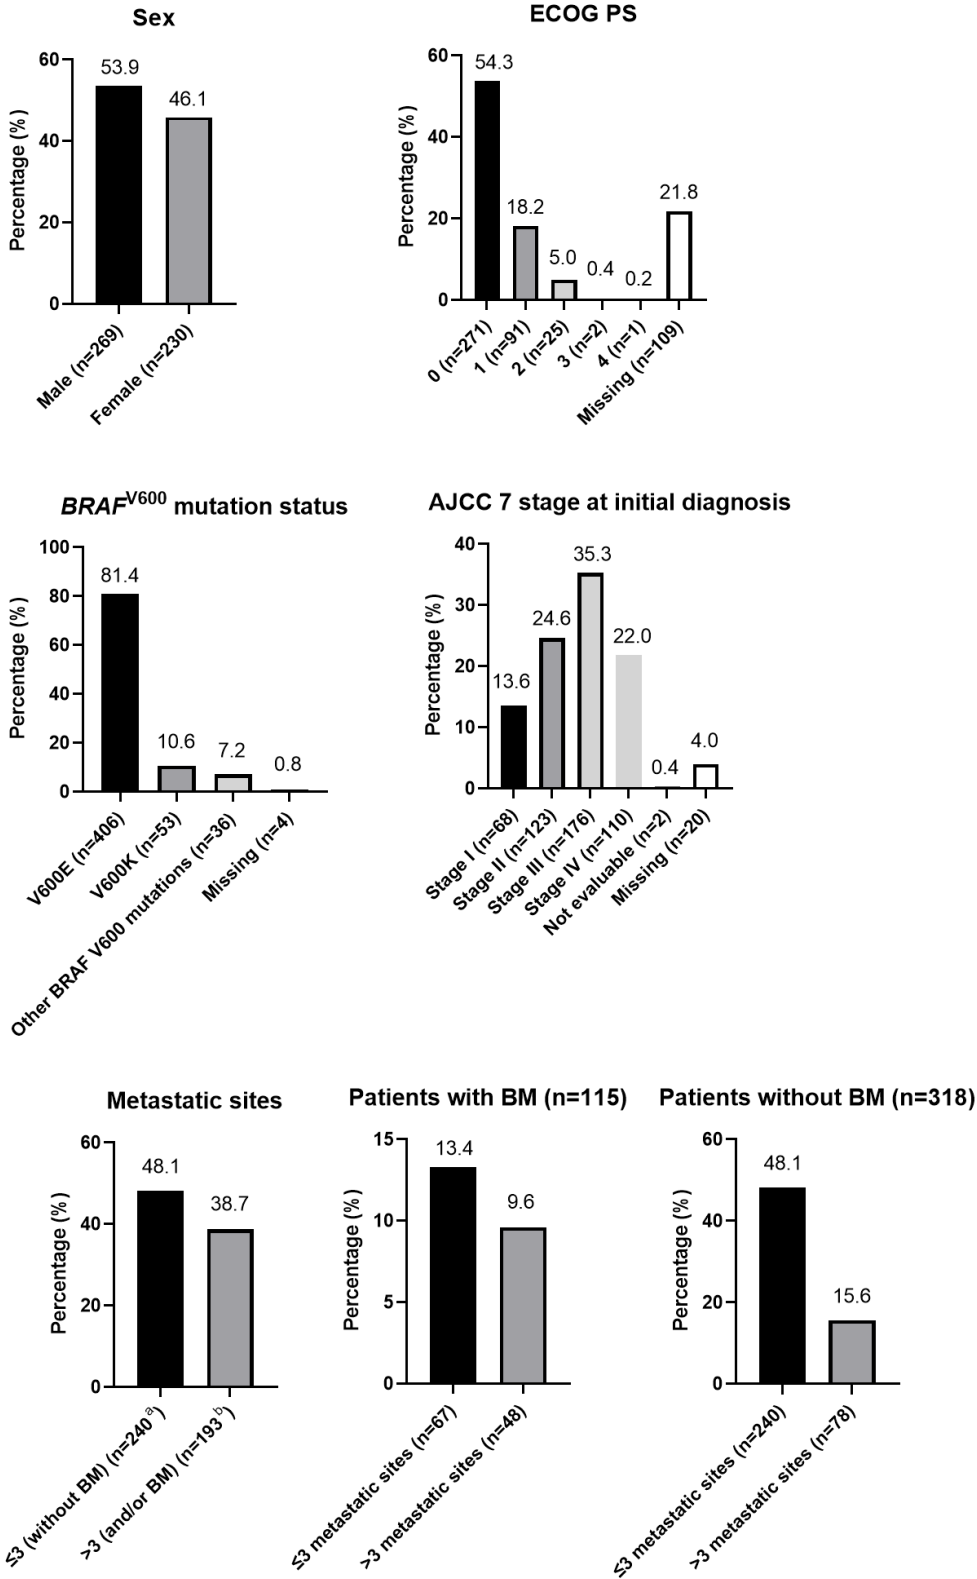

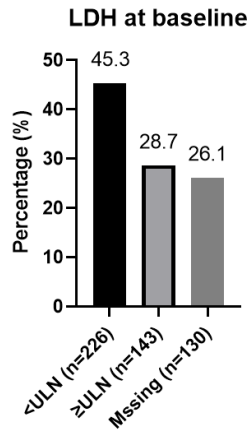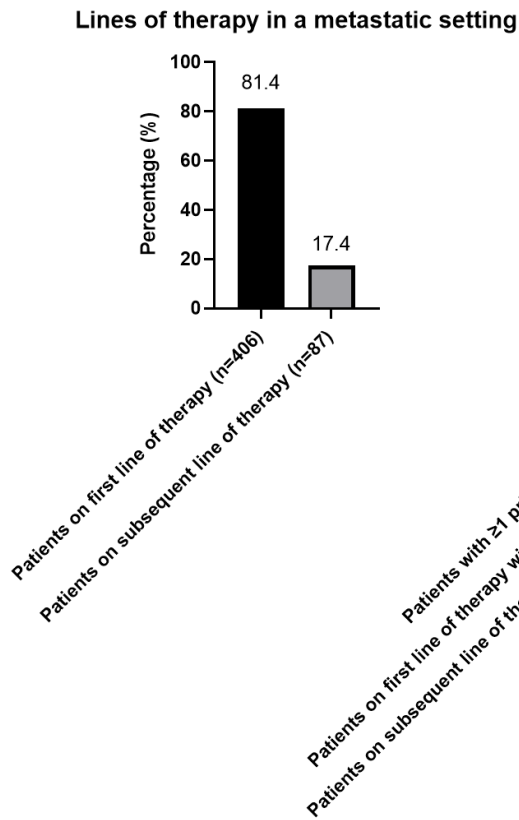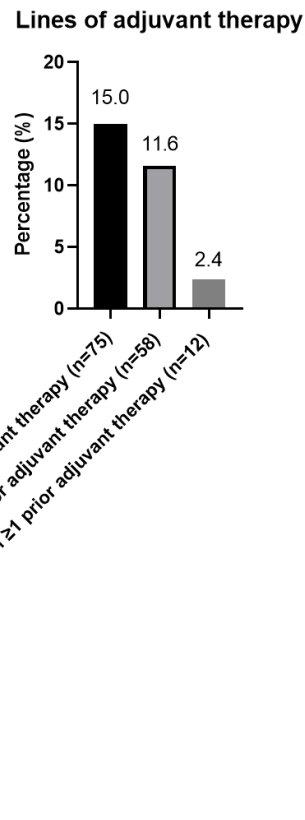

Median time to first recurrence was 17.9 months (range, 0–298), while median time to the most recent relapse was 28.2 months (range, 0–301).

<sup>a</sup> Excluding patients with > 3 metastatic sites (without BM;  $n = 78$ )

<sup>b</sup> Including patients with > 3 metastatic sites (without BM;  $n = 78$ )

AJCC, American Joint Committee on Cancer; BM, brain metastases; ECOG PS, Eastern Cooperative Oncology Group performance status; LDH, lactate dehydrogenase; ULN, upper limit of normal.
